# Supplementary material for: The rs1143679 (R77H) lupus associated variant of ITGAM (CD11b) impairs complement receptor 3 mediated functions in human monocytes
Source: HighWire-hosted journal article supplement (doi:10.1136/annrheumdis-2012-201390), 2012-05-15
Supplement: annrheumdis-2012-201390_ds1.pdf [file annrheumdis-2012-201390_ds1.pdf]

## **SUPPLEMENTARY METHODS**

### **Quantitative RT-PCR primers**

ITGAM

5'-TCCAAGAGAACGCAAGGGGCT-3'

5'-CAGGGACAGGCCAGGGACA-3';

RPL27 (housekeeping gene 1)

5'-ATCGCCAAGAGATCAAAGATAA-3'

5'-TCTGAAGACATCCTTATTGACG-3'

OAZ1 (housekeeping gene 2)

5'-GGATCCTCAATAGCCACTGC-3'

5'-TACAGCAGTGGAGGGAGACC-3'

GAPDH (housekeeping gene 3)

5'-CATGAGAAGTATGACAACAGCCT-3'

5'-AGTCCTTCCACGATACCAAAGT-3'

SRP14 (housekeeping gene 4)

5'-CAGATGGCTTATTCAAACCTCCT-3'

5'-ATGCCCTTTACTGTGCTGCT-3'.

$\Delta$ Ct-levels were calculated in triplicates

### **Preparation of Opsonised Sheep Erythrocytes**

Sheep erythrocytes (sRBCs) were washed and resuspended in Gelatin Veronal Buffer (Sigma) and coated in rabbit anti-sheep erythrocyte IgM (Cedarlane) for 1 hour on a rotator

wheel at room temperature. For the additional opsonisation with iC3b the IgM coated sRBC were further incubated in 10% C5-depleted human serum for 20 minutes at 37°C before washing and resuspending in serum-free RPMI medium. The presence of high concentration iC3b using this technique was confirmed by flow cytometry (using anti-human iC3b primary antibodies (AbD Serotec) – data not shown).

For COS7 phagocytic assay sRBC's were opsonised with rabbit anti-sheep IgG fraction (Sigma). These had better secondary staining characteristics than the IgM antibody and could be used as COS7 cells do not express Fc-gamma receptors.

For cytokine studies sRBCs were prepared in an identical way to that described above except the rabbit anti-sRBC IgM was dialysed in endotoxin-free PBS and filter sterilised and sterile endotoxin PBS substituted for the gelatin veronal buffer.

### **Differential Staining of Internalised and External sRBC's in Phagocytic Assay**

Following incubation of phagocytes with opsonised sRBC, phagocytosis was halted in ice and an external stain using Alexa 488 conjugated goat anti-rabbit IgG secondary antibody was added for 7 minutes (also capable of binding the light chain of the IgM rabbit anti-sheep sRBC primary antibody). Cells were then fixed in 4% paraformaldehyde for 15 minutes, permeabilised in 0.2% Triton X-100, and rewashed before adding the internal stain (Alexa 555 conjugated goat anti-rabbit IgG secondary antibody + DAPI for nuclear localisation) for 45 minutes. Cells were then rewashed and mounted on glass slides using Mowiol resin).

### **Quantification of Adherent Monocytes in Adhesion Assay**

Monocytes adhering to ligand coated flat bottomed 96-well plates were fixed for 20 minutes with 1% glutaraldehyde. Fixed cells were then stained with 0.05% crystal violet (in 20% methanol) and then solubilised with 1% SDS, before measuring absorbance at 595nm (Thermo Multiskan ascent). Preliminary titration (not shown) using firmly adherent COS7 cells to uncoated plastic wells demonstrated a linear relationship between 595nm absorbance and cell number over the range for values reported in this study so data is presented as a percentage difference in adhesion.
